# Supplementary material for: Acute kidney injury electronic alerts: mixed methods Normalisation Process Theory evaluation of their implementation into secondary care in England
Source: PubMed Central journal article supplement — BMJ Open. 2019 Dec 11;9(12):e032925. doi: 10.1136/bmjopen-2019-032925 (PMC6924771; doi:10.1136/bmjopen-2019-032925), 2019-12-11
Supplement: bmjopen-2019-032925supp004.pdf [file bmjopen-2019-032925supp004.pdf]

### **Survey Instructions**

This survey is designed to help get a better understanding of how to apply and integrate new technologies and complex interventions in health care.

This survey asks questions about the implementation of acute kidney injury (AKI) electronic alerts into patients' medical records. We understand that people involved with AKI alerts have different roles, and that people may have more than one role. For this survey, please answer all the statements from the perspective of being an end-user of AKI alerts.

The survey is in 3 parts, Parts A-C:

- Part A asks some brief questions about yourself and your role.
- Part B asks general questions about patient safety and AKI alerts.
- Part C contains four sets of statements about AKI alerts. For each statement in Part C, there is the option to agree or disagree with what is being asked. However, if you feel that the statement is not relevant to you, you can answer 'not relevant'.

The survey is on both sides of paper. Answers to all questions are required, except where it is stated as being optional. The only optional questions are Q15b, Q16b, Q17b, and Q18b.

Please take the time to decide which answer best suits your experience for each statement and tick the appropriate circle.

**If you would like to complete this version electronically (on mobile, tablet or desktop) please use the address below.**

[\[address removed for publication\]](#)

## Electronic alerts for acute kidney injury – end user survey

### Part A: About yourself

Survey number  
(admin only)

**Q1. How would you describe your professional job category?**

- Medical doctor (*go to Q2a*)
- Surgical doctor (*go to Q2a*)
- Nurse (*go to Q2b*)
- Other (*go to Q2c*)

**Q2a. How would you describe your professional job level?**

- Foundation-years doctor 1 (F1)
- Foundation-years doctor 2 (F2)
- Specialist trainee doctor (ST1 or ST2)
- Specialist trainee doctor (ST3, ST4 or ST5)
- Specialist trainee doctor (ST6 or ST7)
- Staff grade doctor
- Consultant
- Other (*go to Q2d*)

*Please go to question 3 on the next page*

**Q2b. How would you describe your professional job level?**

- Band 4
- Band 5
- Band 6
- Band 7
- Band 8a
- Band 8b
- Band 8c
- Other (*go to Q2d*)

*Please go to question 3 on the next page*

**Q2c. How would you describe your professional job category? For example healthcare assistant, nurse, doctor.**

*Please go to question 2d below*

**Q2d. How would you describe your professional job level? For example, your current grade / band**

*Please go to question 3 on the next page*

**Part A: About yourself (continued)**

**Q3. How many full years have you held your primary professional qualification?**

**Q4. Which NHS Trust do you currently work at?**

- Gateshead Health NHS Foundation Trust
- Newcastle upon Tyne Hospitals NHS Foundation Trust
- Northumbria Healthcare NHS Foundation Trust
- Other (please specify in box below)

**Q5. How many full years have you worked in your current role at this NHS Trust?**

*If your Trust has merged with another or changed its name, please include in your answer all the time you have worked with this Trust and its predecessors*

**Q6. Which best describes the department / unit that you work in?**

- Internal Medicine / Care of the Elderly
- Emergency Admissions
- General / Vascular Surgery
- Other (please specify)

**Q7. How many full years have you worked in your current role in this department / unit?**

**Part A: About yourself (continued)**

**Q8. Have you received any formal or informal training in relation to acute kidney injury in the past 24 months?**

- No
- Yes (please specify)

**Q9. Does your team, unit or NHS Trust have any initiatives other than acute kidney injury electronic alerts to improve acute kidney injury awareness?**

- No
- Yes (please specify)

**This is the end of Part A. Please turn over for Part B.**

### Part B: General questions about patient safety

#### Q10. Perceptions of patient safety in your work area / unit

|                                                                           | Strongly disagree     | Disagree              | Neither agree nor disagree | Agree                 | Strongly agree        |
|---------------------------------------------------------------------------|-----------------------|-----------------------|----------------------------|-----------------------|-----------------------|
| It is just by chance that more serious mistakes do not happen around here | <input type="radio"/> | <input type="radio"/> | <input type="radio"/>      | <input type="radio"/> | <input type="radio"/> |
| Patient safety is never sacrificed to get more work done                  | <input type="radio"/> | <input type="radio"/> | <input type="radio"/>      | <input type="radio"/> | <input type="radio"/> |
| We have patient safety problems in this unit                              | <input type="radio"/> | <input type="radio"/> | <input type="radio"/>      | <input type="radio"/> | <input type="radio"/> |
| Our procedures and systems are good at preventing errors from happening   | <input type="radio"/> | <input type="radio"/> | <input type="radio"/>      | <input type="radio"/> | <input type="radio"/> |

#### Q11. Please give your work area / unit in this hospital an overall grade on patient safety

|                      | Failing               | Poor                  | Acceptable            | Very good             | Excellent             |
|----------------------|-----------------------|-----------------------|-----------------------|-----------------------|-----------------------|
| Patient safety grade | <input type="radio"/> |

### Part B: General questions about acute kidney injury alerts

**Q12. When you see an acute kidney injury alert within the patient's record, how familiar does it feel?**

|                          | Still feels very new  |                       |                       |                       |                       |                       |                       |                       |                       | Feels completely familiar |
|--------------------------|-----------------------|-----------------------|-----------------------|-----------------------|-----------------------|-----------------------|-----------------------|-----------------------|-----------------------|---------------------------|
|                          | 1                     | 2                     | 3                     | 4                     | 5                     | 6                     | 7                     | 8                     | 9                     | 10                        |
| Familiarity of AKI alert | <input type="radio"/>     |

**Q13. Do you feel the acute kidney injury alert is currently a normal part of your work?**

|                                                           | Not at all            |                       |                       |                       |                       |                       |                       |                       |                       | Completely            |
|-----------------------------------------------------------|-----------------------|-----------------------|-----------------------|-----------------------|-----------------------|-----------------------|-----------------------|-----------------------|-----------------------|-----------------------|
|                                                           | 1                     | 2                     | 3                     | 4                     | 5                     | 6                     | 7                     | 8                     | 9                     | 10                    |
| Responding to the AKI alert is currently normal (present) | <input type="radio"/> |

**Q14. Do you feel the acute kidney injury alert will become a normal part of your work?**

|                                                         | Not at all            |                       |                       |                       |                       |                       |                       |                       |                       | Completely            |
|---------------------------------------------------------|-----------------------|-----------------------|-----------------------|-----------------------|-----------------------|-----------------------|-----------------------|-----------------------|-----------------------|-----------------------|
|                                                         | 1                     | 2                     | 3                     | 4                     | 5                     | 6                     | 7                     | 8                     | 9                     | 10                    |
| Responding to the AKI alert will become normal (future) | <input type="radio"/> |

**This is the end of Part B. Please turn over for Part C1.**

### Part C1: Detailed questions about acute kidney injury alerts

**Q15a. For each statement, please select one answer that best suits your experience.**

|                                                                                        | Strongly Disagree     | Disagree              | Neither agree nor disagree | Agree                 | Strongly agree        | Not relevant          |
|----------------------------------------------------------------------------------------|-----------------------|-----------------------|----------------------------|-----------------------|-----------------------|-----------------------|
| I can see how the AKI alert differs from usual ways of working                         | <input type="radio"/> | <input type="radio"/> | <input type="radio"/>      | <input type="radio"/> | <input type="radio"/> | <input type="radio"/> |
| Staff in this organisation have a shared understanding of the purpose of the AKI alert | <input type="radio"/> | <input type="radio"/> | <input type="radio"/>      | <input type="radio"/> | <input type="radio"/> | <input type="radio"/> |
| I understand how the AKI alert affects the nature of my own work                       | <input type="radio"/> | <input type="radio"/> | <input type="radio"/>      | <input type="radio"/> | <input type="radio"/> | <input type="radio"/> |
| I can see the potential value of the AKI alert for my work                             | <input type="radio"/> | <input type="radio"/> | <input type="radio"/>      | <input type="radio"/> | <input type="radio"/> | <input type="radio"/> |

**Q15b. Please elaborate on your answers provided in this part (optional)**

**This is the end of Part C1. Please turn over for Part C2.**

**Part C2: Detailed questions about acute kidney injury alerts (continued)****Q16a. For each statement, please select one answer that best suits your experience.**

|                                                                                  | Strongly disagree     | Disagree              | Neither agree nor disagree | Agree                 | Strongly agree        | Not relevant          |
|----------------------------------------------------------------------------------|-----------------------|-----------------------|----------------------------|-----------------------|-----------------------|-----------------------|
| There are key people who drive the AKI alert forward and get others involved     | <input type="radio"/> | <input type="radio"/> | <input type="radio"/>      | <input type="radio"/> | <input type="radio"/> | <input type="radio"/> |
| I believe that responding to the AKI alert is a legitimate part of my role       | <input type="radio"/> | <input type="radio"/> | <input type="radio"/>      | <input type="radio"/> | <input type="radio"/> | <input type="radio"/> |
| I'm open to working with colleagues in new ways when responding to the AKI alert | <input type="radio"/> | <input type="radio"/> | <input type="radio"/>      | <input type="radio"/> | <input type="radio"/> | <input type="radio"/> |
| I will continue to support the AKI alert                                         | <input type="radio"/> | <input type="radio"/> | <input type="radio"/>      | <input type="radio"/> | <input type="radio"/> | <input type="radio"/> |

**Q16b. Please elaborate on your answers provided in this part (optional)****This is the end of Part C2. Please turn over for Part C3.**



### Part C3: Detailed questions about acute kidney injury alerts (continued)

**Q17a. For each statement, please select one answer that best suits your experience.**

|                                                                                  | Strongly disagree     | Disagree              | Neither agree nor disagree | Agree                 | Strongly agree        | Not relevant          |
|----------------------------------------------------------------------------------|-----------------------|-----------------------|----------------------------|-----------------------|-----------------------|-----------------------|
| I can easily integrate the AKI alert into my existing work                       | <input type="radio"/> | <input type="radio"/> | <input type="radio"/>      | <input type="radio"/> | <input type="radio"/> | <input type="radio"/> |
| The AKI alert disrupts working relationships                                     | <input type="radio"/> | <input type="radio"/> | <input type="radio"/>      | <input type="radio"/> | <input type="radio"/> | <input type="radio"/> |
| I have confidence in other people's ability to respond to the AKI alert          | <input type="radio"/> | <input type="radio"/> | <input type="radio"/>      | <input type="radio"/> | <input type="radio"/> | <input type="radio"/> |
| Work is assigned to those with skills appropriate to responding to the AKI alert | <input type="radio"/> | <input type="radio"/> | <input type="radio"/>      | <input type="radio"/> | <input type="radio"/> | <input type="radio"/> |
| Sufficient training is provided to enable staff to implement the AKI alert       | <input type="radio"/> | <input type="radio"/> | <input type="radio"/>      | <input type="radio"/> | <input type="radio"/> | <input type="radio"/> |
| Sufficient resources are available for the AKI alert                             | <input type="radio"/> | <input type="radio"/> | <input type="radio"/>      | <input type="radio"/> | <input type="radio"/> | <input type="radio"/> |
| Management adequately supports the AKI alert                                     | <input type="radio"/> | <input type="radio"/> | <input type="radio"/>      | <input type="radio"/> | <input type="radio"/> | <input type="radio"/> |

**Q17b. Please elaborate on your answers provided in this part (optional)**

**This is the end of Part C3. Please turn over for Part C4.**

### Part C4: Detailed questions about acute kidney injury alerts

**Q18a. For each statement, please select one answer that best suits your experience.**

|                                                                      | Strongly Disagree     | Disagree              | Neither agree nor disagree | Agree                 | Strongly agree        | Not relevant          |
|----------------------------------------------------------------------|-----------------------|-----------------------|----------------------------|-----------------------|-----------------------|-----------------------|
| I am aware of reports about the effects of the AKI alert             | <input type="radio"/> | <input type="radio"/> | <input type="radio"/>      | <input type="radio"/> | <input type="radio"/> | <input type="radio"/> |
| The staff agree that the AKI alert is worthwhile                     | <input type="radio"/> | <input type="radio"/> | <input type="radio"/>      | <input type="radio"/> | <input type="radio"/> | <input type="radio"/> |
| I value the effects that the AKI alert has had on my work            | <input type="radio"/> | <input type="radio"/> | <input type="radio"/>      | <input type="radio"/> | <input type="radio"/> | <input type="radio"/> |
| Feedback about the AKI alert can be used to improve it in the future | <input type="radio"/> | <input type="radio"/> | <input type="radio"/>      | <input type="radio"/> | <input type="radio"/> | <input type="radio"/> |
| I can modify how I work with the AKI alert                           | <input type="radio"/> | <input type="radio"/> | <input type="radio"/>      | <input type="radio"/> | <input type="radio"/> | <input type="radio"/> |

**Q18b. Please elaborate on your answers provided in this part (optional)**

**Please turn over**

### **This is the end of the survey**

Thank you for completing the survey; your participation is greatly appreciated. We understand that the nature of a survey may not allow you to fully express your thoughts and opinions about the acute kidney injury alerts. If you feel this is the case and would be interested in participating in an interview (if you have not already), please leave your name and email address below and we will be in touch shortly with more information. These will not be linked back to your survey responses. If you are not interested in hearing more about an interview, please leave the box blank.

**Name**

**Email address**
